# Supplementary material
Source: MDPI journal article supplement (https://www.mdpi.com/1424-8247/16/6/902)
Supplement: s1 [file s1]

Supplementary Figure

A

TW01

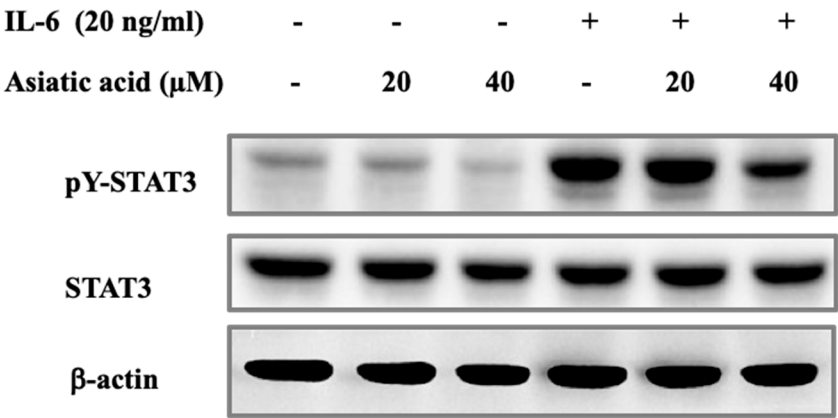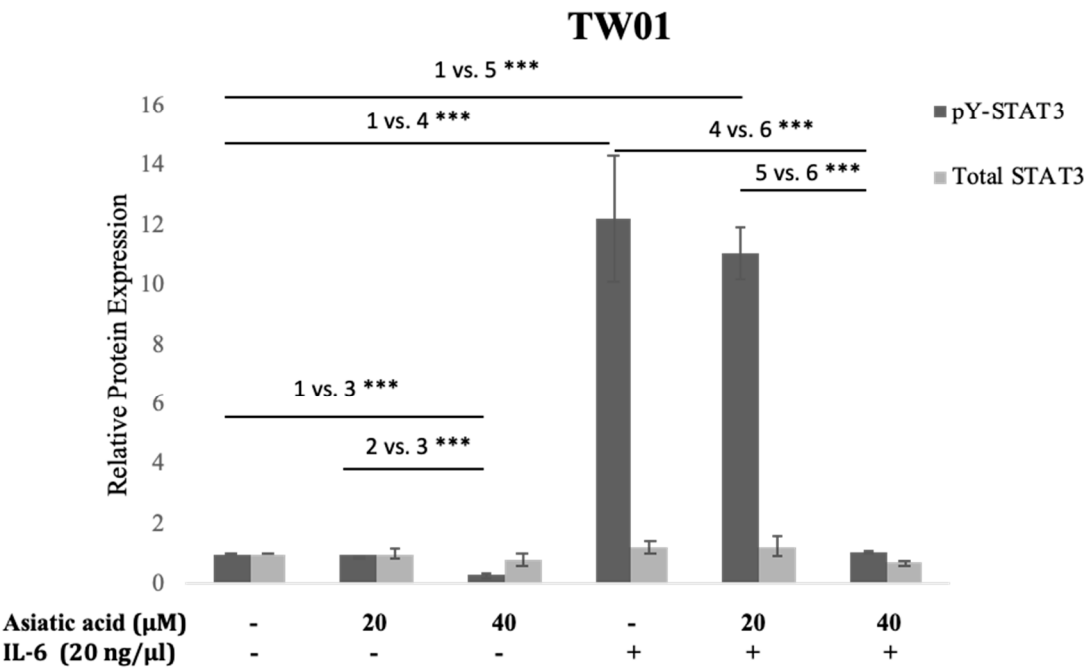

**B****SUNE5-8F**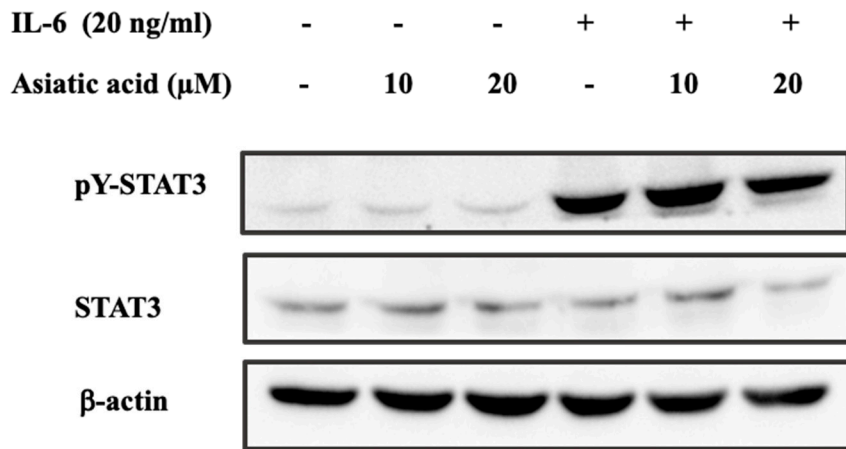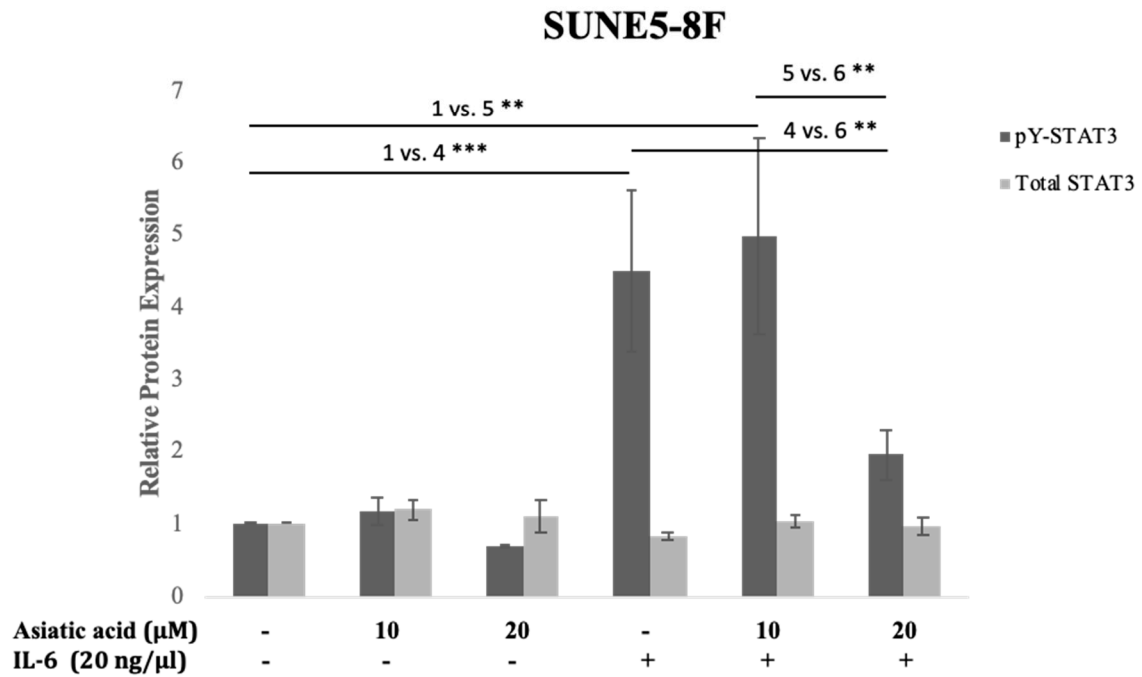

**Figure S1.** Asiatic acid inhibits constitutive STAT3 and IL-6-induced STAT3 phosphorylation in nasopharyngeal carcinoma cells. (A) TW01 and (B) SUNE5-8F cells were pretreated with asiatic acid at the indicated concentrations for 24 h and then stimulated with 20 ng/ml of IL-6 for 30 min. Western blot analysis was performed to examine the levels of phospho-STAT3 protein expression in TW01 and SUNE5-8F cells. β-actin was used as a loading control. Densitometry analysis of protein expression was quantified using ImageJ software. Data represented as mean ± SE from three independent experiments. \*  $p \leq 0.05$ , \*\*  $p \leq 0.01$ , \*\*\*  $p \leq 0.001$  using one-way ANOVA followed by Tukey's honestly significant difference test.
